# Supplementary material
Source: PubMed Central journal article supplement (PMC3172111)
Supplement: cdd201111x1.pdf [file cdd201111x1.pdf]

## Supplementary Figure S1

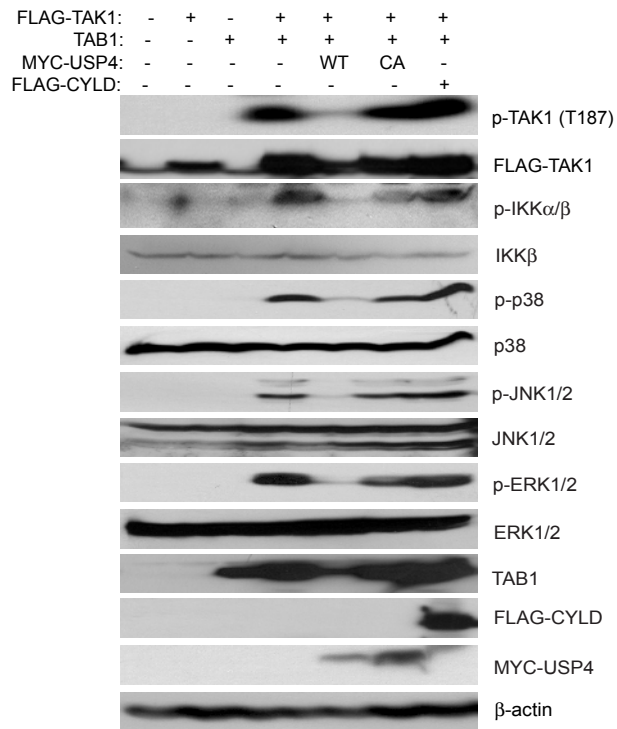

## Supplementary Figure S2

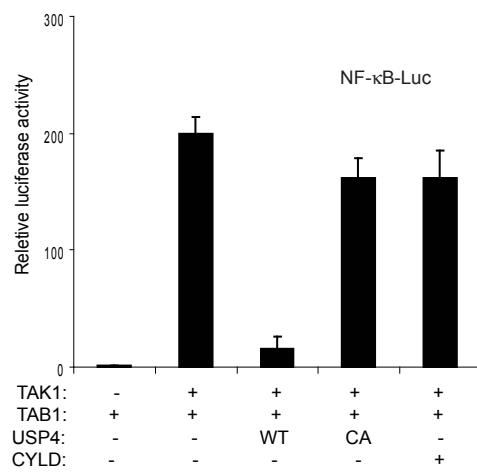

### Supplementary Figure S3

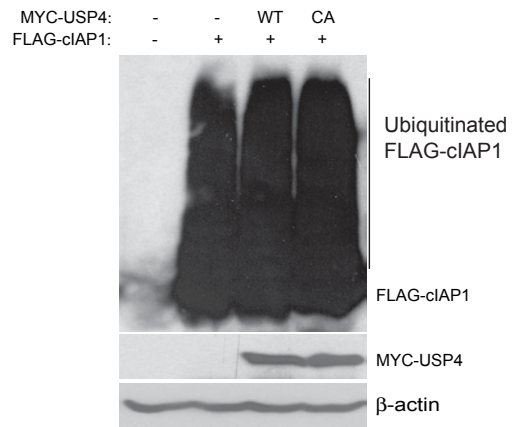

## Supplementary Figure S4

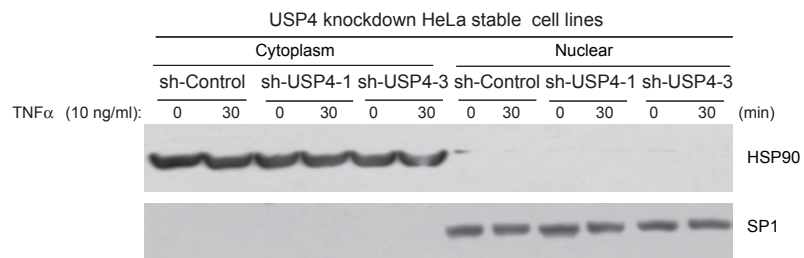

Supplementary Figure S5

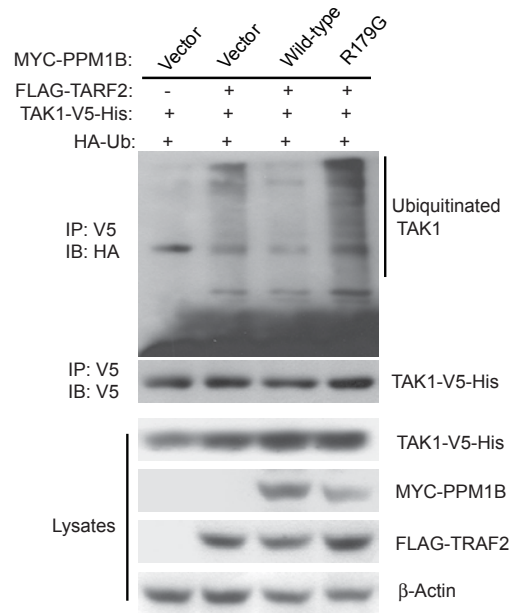

## Supplementary Table S1 Primers

| No. | Name                  | Sequence (5' → 3')                       |
|-----|-----------------------|------------------------------------------|
| 1   | sh-USP4-1             | AACATGTCCGAGTTTGTCTGT                    |
| 2   | sh-USP4-3             | AACTGTAAGAAGCATCAACAG                    |
| 3   | USP4-WT-Resuce-5'     | AGGGCTGAACATGAGTGAATTCGTATGTAACCTGTCAG   |
| 4   | USP4-WT-Resuce-3'     | CTGACAGGTTACATACGAATTCACCTCATGTTTCAGCCCT |
| 5   | hMIP3 $\alpha$ -RT-5' | GCCAATGAAGGCTGTGACAT                     |
| 6   | hMIP3 $\alpha$ -RT-3' | TGTGCAAGTAAAACCTCCAA                     |
| 7   | hMnSOD-RT-5'          | GGAAGCCATCAAACGTGACT                     |
| 8   | hMnSOD-RT-3'          | GTAGTAAGCGTGCTCCCACA                     |
| 9   | hMCP-1-RT-5'          | CCCCAGTCACCTGCTGTTAT                     |
| 10  | hMCP-1-RT-3'          | GAGTTTGGGTTTGCTTGTC                      |
| 11  | hIkB $\alpha$ -RT-5'  | CCAGGGCTATTCTCCCTACC                     |
| 12  | hIkB $\alpha$ -RT-3'  | CTTTGCGCTCATAACGTCAG                     |
| 13  | hclAP2-RT-5'          | TGCAAGAAGCTGAAGCTGTG                     |
| 14  | hclAP2-RT-3'          | GAAGGAGCACAATCTTTGCAT                    |
| 15  | hA20-RT-5'            | TTGGAAGCACCATGTTTGAA                     |
| 16  | hA20-RT-3'            | TGGGATGCTGACACTCCAT                      |
| 17  | hGAPDH-RT-5'          | CCTCAACGACCACTTTGTCA                     |
| 18  | hGAPDH-RT-3'          | GACTGAGTGTGGCAGGGACT                     |
